# Supplementary material for: Bioavailability and systemic transport of oleanolic acid in humans, formulated as a functional olive oil
Source: Royal Society of Chemistry journal article supplement (doi:10.1039/d3fo02725b), 2023-01-01
Supplement: d3fo02725b1.pdf [file d3fo02725b1.pdf]

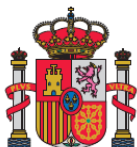

MINISTERIO  
DE CIENCIA  
E INNOVACIÓN

## APPENDIX A

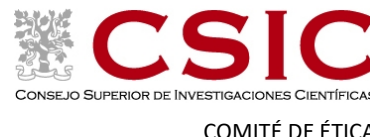

COMITÉ DE ÉTICA

# HOJA DE INFORMACIÓN AL PARTICIPANTE

|                                      |                                                                                                                                     |
|--------------------------------------|-------------------------------------------------------------------------------------------------------------------------------------|
| TÍTULO DEL PROYECTO:                 | <b>ÁCIDO OLEANÓLICO COMO COADYUVANTE TERAPÉUTICO EN EL TRATAMIENTO DE LA DIABETES MELLITUS TIPO 2. ESTUDIO DE BIODISPONIBILIDAD</b> |
| PROMOTOR/FINANCIADOR:                | <b>Agencia Estatal de Investigación. Proyectos I+D+i 2019 Retos Investigación</b>                                                   |
| INVESTIGADOR/ES RESPONSABLE/S:       | Castellano Orozco, José María/ García Luna, Pedro Pablo                                                                             |
| CARGO:                               | JEFE DEPARTAMENTO ALIMENTACIÓN Y SALUD (IG-CSIC)<br>MÉDICO ESPECIALISTA COORDINADOR UNIDAD NUTRICIÓN (HUVR)                         |
| DEPARTAMENTO/UNIDAD:                 | ALIMENTACIÓN Y SALUD/U.G.C. ENDOCRINOLOGÍA Y NUTRICIÓN                                                                              |
| CENTRO DE ADSCRIPCIÓN:               | INSTITUTO DE LA GRASA-CSIC/HOSPITAL UNIVERSITARIO VIRGEN DEL ROCÍO                                                                  |
| LUGAR DONDE SE REALIZARÁ EL ESTUDIO: | HOSPITAL UNIVERSITARIO VIRGEN DEL ROCÍO                                                                                             |
| TELÉFONO:                            | 955012026/954611550                                                                                                                 |
| E-MAIL:                              | ugenhuvr.investigacion@gmail.com/jmcas@ig.csic.es                                                                                   |

## I. INTRODUCCIÓN

Le entregamos este documento para informarle sobre una actividad de investigación aprobada por el Comité de Ética del CSIC a la que se le invita a participar de forma voluntaria. Para ello, le rogamos que lea esta hoja informativa con atención y nos consulte cualquier mínima duda que le surja.

## II. DESCRIPCIÓN GENERAL DE LA INVESTIGACIÓN

La diabetes es un problema de salud mundial debido a su alta prevalencia y al alto coste en sufrimiento y recursos económicos que causa. La diabetes de tipo 2 (T2DM), la forma más común de la enfermedad, se relaciona con el estilo de vida (dietas inadecuadas y sedentarismo) y con el fuerte crecimiento del sobrepeso/obesidad en la población. Es deseable encontrar nuevos compuestos de origen natural, eficaces y seguros, que puedan ser utilizados en el tratamiento de la diabetes a través de la dieta. El ácido oleanólico es un componente natural de la aceituna y el aceite de oliva, y también de otros vegetales, que ha demostrado ejercer una acción protectora frente a la diabetes. El CSIC y el Servicio Andaluz de Salud desarrollamos entre 2008 y 2018 un ensayo clínico de intervención dietética (Estudio PREDIABOLE) que demostró que el consumo regular de aceite de oliva enriquecido en ácido oleanólico es efectivo en prevenir la diabetes en pacientes prediabéticos.

Para avanzar en el aprovechamiento del potencial terapéutico del ácido oleanólico es necesario conocer mejor la farmacocinética del compuesto. Esto es, saber si es biodisponible, cómo se absorbe, cómo se transporta, cómo se distribuye y cómo se elimina el compuesto de nuestro cuerpo. Se ha diseñado un estudio farmacocinético en el que Usted recibirá un desayuno experimental que incluye una cantidad de aceite de oliva (que puede estar enriquecido en ácido oleanólico o no). Antes del desayuno y posteriormente cada hora (hasta la séptima hora) se les extraerá una muestra de sangre cubital. Finalizada esa primera sesión del ensayo, establecemos un periodo de descanso de cuatro semanas. Pasado este tiempo, repetiremos el procedimiento suministrándole el tipo de aceite de oliva (enriquecido o no) que no tomó en la primera sesión.

De las alícuotas de sangre extraídas, se obtendrán inmediatamente los sueros. En los laboratorios del Instituto de la Grasa-CSIC se analizarán los contenidos séricos de ácido oleanólico y procederemos al aislamiento de lipoproteínas y otras proteínas séricas para investigar la asociación del ácido oleanólico con ellas.

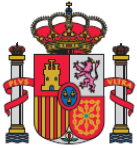

### III. NATURALEZA DE LA PARTICIPACIÓN

Su participación en esta investigación es totalmente voluntaria y por ello, usted puede decidir participar o no. De igual modo, puede cambiar su decisión y revocar su consentimiento en cualquier momento, sin que esto le afecte en modo alguno.

Paralelamente, le informamos de que existe la posibilidad de que, durante el desarrollo del estudio, Usted pueda ser excluido de la investigación, ya sea por motivos de seguridad, por la observación de cualquier acontecimiento adverso que se produzca y se considere relacionado con su participación en la investigación, o porque se considere que Usted no está cumpliendo con los procedimientos establecidos. En cualquiera de los casos, recibirá una explicación adecuada del motivo que ha ocasionado su retirada de la investigación. Usted tiene la posibilidad de elegir el destino de sus muestras y/o datos en caso de retirarse del estudio, incluyendo su destrucción.

#### BENEFICIOS

Si Usted participa voluntariamente en este estudio contribuye al avance del conocimiento científico sobre nuevas herramientas terapéuticas para combatir la diabetes y otras enfermedades degenerativas asociadas con la resistencia a la insulina. No es esperable que una sola dosis de aceite de oliva enriquecido en ácido oleanólico pueda tener un efecto significativo sobre su salud en ningún sentido, pero contribuirá a obtener datos imprescindibles para el diseño de un próximo ensayo clínico con pacientes diabéticos. Los resultados que se obtengan reforzarán la evidencia sobre los componentes bioactivos del aceite de oliva, lo cual es, además, muy relevante para Andalucía y para España, y sus entornos rurales, que en muchos casos están socioeconómicamente muy ligados al cultivo del olivo y la industria de sus aceites.

#### RIESGOS

No se esperan acontecimientos más allá de los inconvenientes causados por la extracción de sangre. Los volúmenes a extraer son reducidos (16 ml de media con un total de 118 ml en 7 horas) por lo que no representan un riesgo. El acceso a la vena cubital se realiza por punción a través de un catéter de tipo abbocath, por lo que solamente se realiza una punción. se podrá notar algo de incomodidad por mantener el catéter insertado durante las 7 horas.

Por otro lado, en el desayuno experimental Usted ingerirá aceite de oliva comercial enriquecido en ácido oleanólico, pan integral y leche, por lo que, salvo la existencia o aparición de alergias a algunos de estos componentes, no existe riesgo para su salud. No obstante, no se puede excluir absolutamente la aparición de reacciones alérgicas al ácido oleanólico, si bien le informamos de que este compuesto es componente natural de frutos habituales en nuestra dieta, como las aceitunas, los tomates o las uvas, por lo que si Usted no padece reacciones alérgicas a estos alimentos es muy improbable que las experimente por la ingesta del aceite de oliva funcional.

Es posible que sea necesario volver a contactar con usted a fin de recabar nuevos datos u obtener nuevas muestras. en tal caso usted tiene la potestad de negarse a este nuevo requerimiento.

#### RESPONSABILIDAD DEL EQUIPO



Toda investigación con seres humanos comporta un riesgo, por poco probable que sea, y exige el aseguramiento previo de los daños y perjuicios para el participante que pudieran derivarse de aquélla. Por esto, los investigadores del CSIC y del Servicio Andaluz de Salud implicados de esta investigación han contratado una póliza de responsabilidades civiles frente a imprevistos que pudieran surgir en la ejecución del estudio, por lo que las compensaciones por daños quedan debidamente garantizadas.

Aunque no se esperan acontecimientos y los riesgos para usted son insignificantes, el estudio se llevará a cabo en dependencias del Servicio de Urgencias del Hospital Universitario Virgen del Rocío. El desarrollo del estudio será presencialmente supervisado por personal facultativo y contará con la participación de personal de enfermería. Por su inserción en el complejo hospitalario, se asegura una capacidad de respuesta inmediata de excelencia frente a posibles riesgos derivados de la participación de los voluntarios.

## IV. PROCEDIMIENTOS

El estudio de la biodisponibilidad del ácido oleanólico formulado como aceite de oliva funcional, administrado oralmente, se aborda mediante una intervención dietética con 20 voluntarios sanos, mujeres y hombres, que han de satisfacer los criterios de inclusión y no presentar ninguno de los criterios de exclusión que se enuncian a continuación:

### Criterios de inclusión:

- 1) edad comprendida entre los de 18 a 65 años.
- 2) IMC en el rango 18.5-29.9 Kg/m<sup>2</sup>
- 3) otorgar su consentimiento voluntario por escrito a los protocolos aprobados por los Comités Institucionales para la Investigación Humana del HUVR, después de ser convenientemente informado tanto oralmente como documentalmente.
- 4) estar dispuesto a cumplir con todos los procedimientos del estudio.

### Criterios de exclusión:

- 1) presentar, en el momento del reclutamiento, cualquier tipo de patología (digestiva, metabólica, endocrina, infecciosa, neoplasias, etc.) y/o alergias e intolerancias asociadas al consumo de alimentos
- 2) encontrarse en tratamiento farmacológico con cualquier tipo de medicamento, excepto anticonceptivos
- 3) mujeres embarazadas y lactantes
- 4) haber participado en los últimos 60 días en un ensayo clínico con un producto en investigación, o que se encuentre inscrito en un ensayo clínico
- 5) presentar cualquier limitación física o intelectual que, en opinión del investigador, pueda impedir el cumplimiento de los protocolos establecidos.
- 6) Tener cualquier tipo de vinculación con el staff implicado en el estudio.

Los participantes serán reclutados después de que el análisis bioquímico y hematológico completo arroje resultados dentro de los límites normales. La investigación se realizará en el Hospital de Día del Servicio de Endocrinología y Nutrición del HUVR.

El estudio incluye dos sesiones. En una de ellas Usted ingerirá aceite de oliva enriquecido en ácido oleanólico, y en la otra, el mismo aceite de oliva sin enriquecer. En cada ocasión se le facilitarán 55 mL de aceite de oliva, integrado en un desayuno experimental que, además, incluye 3 rebanadas de pan integral y un vaso de leche. La ingesta de estos alimentos no tiene ningún riesgo sobre la salud, salvo la existencia de alergias a algunos de ellos.

Si Usted participa en el estudio, deberá evitar el consumo de bebidas alcohólicas y tabaco durante el día anterior a las sesiones. En los días de ensayo, y después de 12 horas de ayuno nocturno, se le extraerá una

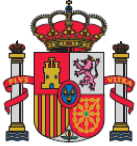

muestra de sangre de la vena cubital. Tras esta extracción, tomará el desayuno experimental, y tras el mismo, se le practicarán extracciones sanguíneas cada hora (alrededor de 15-20 mL por extracción), durante siete horas. El acceso a la vena se aborda mediante punción con un catéter Abbocath® al que se le adapta una válvula Smartsite TM (Ivac®, Spec-Sets®) y un sistema Vacutainer® para tubos estériles Hemogard® con separador de silicona. Este procedimiento tiene solo los riesgos inherentes a una extracción sanguínea sencilla. Durante todo el periodo postprandial se permitirá el libre acceso a la toma de agua.

De las alícuotas de sangre cubital se obtendrán sueros por centrifugación y se analizarán los contenidos de ácido oleanólico libre y asociado a lipoproteínas ricas en triglicéridos y a la albúmina. A partir de los datos del contenido sérico de OA libre a lo largo del periodo posprandial determinaremos: 1) parámetros de absorción, como la concentración máxima alcanzada y el momento para la misma, la constante de absorción y el área bajo la curva; 2) parámetros de distribución, como la constante y el volumen de distribución; 3) parámetros del metabolismo, como la fracción de OA asociada con la albúmina; y 4) parámetros de eliminación, como la constante de eliminación, la vida media y el aclaramiento.

Por otro lado, desde el inicio del ensayo se le aplicará un sensor cutáneo que monitorizará de forma continua la glucemia. Los sensores permanecerán recopilando datos durante 24 horas.

## V. INFORMACIÓN RELATIVA A DATOS Y/O MUESTRAS

Se le manifiesta que en materia de protección de datos, se dará cumplimiento a lo contemplado en el REGLAMENTO (UE) 2016/679 DEL PARLAMENTO EUROPEO Y DEL CONSEJO de 27 de abril de 2016 relativo a la protección de las personas físicas en lo que respecta al tratamiento de datos personales y a la libre circulación de estos datos y por el que se deroga la Directiva 95/46/CE (Reglamento general de protección de datos), así como en la Ley Orgánica 3/2018, de 5 de diciembre, de Protección de Datos Personales y garantía de los derechos digitales.

Asimismo, se le informa de que le asiste el derecho de solicitar al Dr. Pedro Pablo García Luna, coordinador clínico del estudio, el acceso a sus datos personales, así como a su rectificación y supresión, a la limitación de su tratamiento, a la portabilidad de los datos, o cualesquiera otros que pudieran corresponderles.

Igualmente, se le comunica que si desea realizar cualquier interpelación ante el CSIC puede contactar con D. José López Calvo, Vocal Asesor de Asesoría Jurídica y Delegado de Protección de Datos, a través de las direcciones de correo [delegadoprotecciondatos@csic.es](mailto:delegadoprotecciondatos@csic.es); [repd@csic.es](mailto:repd@csic.es); [jose.lopez.calvo@csic.es](mailto:jose.lopez.calvo@csic.es)

Durante su participación en el Estudio OLTRAD, se obtendrán datos personales de los participantes (filiación, medidas antropométricas y valores analíticos). Se le garantiza que solo le serán solicitados aquellos datos que sean estrictamente necesarios para la consecución de los objetivos abordados en esta investigación. En el momento de la aleatorización, se le asignará un código ID a modo de pseudónimo, para asegurar la confidencialidad de su información sensible frente a todos los investigadores no médicos del proyecto.

Los datos clínicos obtenidos serán guardados confidencialmente en medios informáticos (disco duro) en el ordenador personal del coordinador del estudio, que está protegido bajo contraseña. Además, se realizará una copia de respaldo en otro disco duro, también protegido con contraseña al que solo tiene acceso este investigador.

Los datos analíticos asociados a cada código ID obtenidos en el Instituto de la Grasa-CSIC serán guardados en medios informáticos (disco duro) en el ordenador personal del Dr. José María Castellano Orozco, investigador principal 1 del proyecto, que está protegido bajo contraseña. Además, se realizará una copia de respaldo en otro disco duro, también protegido con contraseña al que solo tiene acceso este investigador.

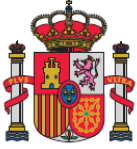

Los datos custodiados se conservarán en los mencionados dispositivos de almacenamiento durante un máximo de 10 años.

No está contemplada la cesión de estos datos a terceros, salvo por imperativo legal. En cambio, sí cabe la posibilidad de que se deseara utilizarlos en nuevas investigaciones por los mismos científicos implicados en este estudio. En ese caso, se precisará el consentimiento informado para la utilización de sus datos.

Dados los volúmenes de sangre y orina obtenidos en cada toma de muestra, no se contempla la acumulación de remanentes. Por ello, tanto el Laboratorio de Análisis y Bioquímica Clínica del Hospital Universitario Virgen del Rocío de Sevilla como el Instituto de la Grasa-CSIC se encargarán de la eliminación de los residuos de acuerdo a los protocolos establecidos en ambas instituciones.

## VI. PARA MÁS INFORMACIÓN

Usted tiene derecho a clarificar todas las dudas que se le presenten en cualquier momento, pudiendo solicitar información más detallada sobre la investigación. Para ello, puede comunicarse con los investigadores principales cuyos datos de contacto se relacionan al comienzo de este documento.

También le informamos de que existe la posibilidad de que, durante el desarrollo del estudio, Usted pueda ser excluido de la investigación, ya sea por motivos de seguridad, por la observación de cualquier acontecimiento adverso que se produzca y se considere relacionado con su participación en la investigación, o porque se considere que Usted no está cumpliendo con los procedimientos establecidos. En cualquiera de los casos, recibirá una explicación adecuada del motivo que ha ocasionado su retirada de la investigación. Usted tiene la posibilidad de elegir el destino de sus muestras y/o datos en caso de retirarse del estudio, incluyendo su destrucción.

Si considera que todas las dudas han sido aclaradas y tiene la convicción de participar en este estudio, a continuación, puede firmar la hoja de consentimiento informado.



## HOJA DE CONSENTIMIENTO INFORMADO

TÍTULO DEL PROYECTO: **ÁCIDO OLEANÓLICO COMO COADYUVANTE TERAPÉUTICO EN EL TRATAMIENTO DE LA DIABETES MELLITUS TIPO 2. ESTUDIO DE BIODISPONIBILIDAD**

PROMOTOR/FINANCIADOR: **Agencia Estatal de Investigación. Proyectos I+D+i 2019 Retos Investigación**

INVESTIGADOR/ES RESPONSABLE/S: **Castellano Orozco, José María/ García Luna, Pedro Pablo**

PERSONA QUE PROPORCIONA LA INFORMACIÓN Y CONSENTIMIENTO INFORMADO: \_\_\_\_\_

PARTICIPANTE: \_\_\_\_\_

D/D<sup>a</sup>. \_\_\_\_\_, con DNI \_\_\_\_\_ y domicilio en \_\_\_\_\_.

**DECLARO** que he leído la Hoja de Información al participante, de la cual se me ha entregado una copia, que he contado con el tiempo suficiente, que se me ha ofrecido la oportunidad de hacer preguntas y que he recibido suficiente información por parte del investigador D/D<sup>a</sup>. \_\_\_\_\_, quien me ha explicado convenientemente las condiciones de mi participación en esta investigación. Asimismo, se me ha asegurado el tratamiento confidencial de mis datos.

Declaro adicionalmente que comprendo que mi participación es voluntaria, por lo que puedo retirarme de la investigación libremente y revocar mi consentimiento, en cualquier momento y por cualquier razón.

- DOY** **Mi consentimiento para ser participe en el estudio propuesto**
- NO DOY**
- DOY** **Mi consentimiento para incorporar las muestras a una Colección/Biobanco (si procede)**
- NO DOY**
- DOY** **Mi consentimiento para ser informado de datos concernientes a mi salud o a la de mis familiares**
- NO DOY**

Firmo por duplicado y guardo una copia:

Fecha y firma del participante.



MINISTERIO  
DE CIENCIA  
E INNOVACIÓN

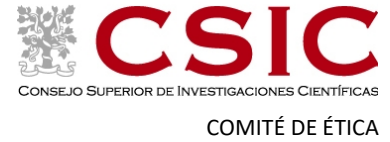

COMITÉ DE ÉTICA

D/D<sup>a</sup> \_\_\_\_\_ , investigador responsable de la obtención de este consentimiento informado, con DNI \_\_\_\_\_ , **DECLARO** que he explicado las características y alcance de la investigación al participante, atendiendo a sus capacidades, (con especial delicadeza si se trata de población sensible) y le he informado de los potenciales riesgos y beneficios directos derivados de la misma. Quien rubrica este documento fechado otorga voluntariamente su consentimiento para participar en la investigación descrita.

Fecha y firma de la persona responsable de la obtención del consentimiento informado.

## APPENDIX B

Table S1. Chemical composition of the oil used in the postprandial trial

|                               | component                                   | value        |
|-------------------------------|---------------------------------------------|--------------|
| Quality indexes               | free acidity (% oleic acid)                 | 0.37 ± 0.02  |
|                               | peroxide value (meq O <sub>2</sub> /kg oil) | 3.39 ± 0.02  |
|                               | k <sub>232</sub>                            | 1.82 ± 0.17  |
|                               | k <sub>270</sub>                            | 0.29 ± 0.00  |
| Fatty acids (%)               | palmitic (16:0)                             | 10.4 ± 0.3   |
|                               | palmitoleic (16:1 n-7)                      | 0.8 ± 0.0    |
|                               | stearic (18:0)                              | 3.4 ± 0.1    |
|                               | oleic (18:1 n-9)                            | 77.4 ± 0.1   |
|                               | linoleic (18:2, n-6)                        | 5.8 ± 0.0    |
|                               | α-linolenic (18:3 n-3)                      | 0.3 ± 0.1    |
|                               | arachidic (20:0)                            | 0.4 ± 0.1    |
|                               | gadoleic (20:1 n-11)                        | 0.7 ± 0.0    |
|                               | behenic (22:0)                              | 0.2 ± 0.0    |
|                               | others                                      | 0.3 ± 0.1    |
| Phenolics (μg/g oil)          | hydroxytyrosol and tyrosol and derivatives  | 21.7 ± 0.2   |
|                               | lignanes                                    | 39.8 ± 0.2   |
|                               | flavonoids                                  | 0.5 ± 0.0    |
|                               | simple phenols                              | 0.3 ± 0.0    |
|                               |                                             | 0.0 ± 0.0    |
| Phytosterols (μg/g oil)       | β-sitosterol                                | 1223.0 ± 2.1 |
|                               | δ5-avenasterol                              | 50.6 ± 0.9   |
|                               | campesterol                                 | 47.9 ± 0.1   |
|                               | stigmasterol                                | 12.7 ± 0.0   |
|                               | clerosterol                                 | 15.5 ± 0.0   |
|                               | δ5,24-stigmastadienol                       | 16.2 ± 0.7   |
|                               | δ5,23-stigmastadienol                       | 9.9 ± 0.0    |
| Tocopherols (μg/g oil)        | α-tocopherol                                | 236.7 ± 0.7  |
|                               | other isomorphes                            | 34.1 ± 0.9   |
| Triterpenoids (μg/g oil)      | erythrodiol                                 | 40.9 ± 0.1   |
|                               | uvaol                                       | 3.5 ± 0.7    |
|                               | oleanolic acid                              |              |
|                               | control oil                                 | 3.9 ± 0.1    |
|                               | enriched oil                                | 628.7 ± 30.1 |
|                               | maslinic acid                               | 4.6 ± 0.2    |
| Total chlorophylls (μg/g oil) |                                             | 1.3 ± 0.1    |
| Total carotenoids (μg/g oil)  |                                             | 1.4 ± 0.0    |
